# Supplementary material for: Templated nanoreactor arrays for nanoscale-tunable liquid-phase catalysis
Source: Royal Society of Chemistry journal article supplement (doi:10.1039/c9cc00834a), 2019-01-01
Supplement: c9cc00834a1.pdf [file c9cc00834a1.pdf]

## Electronic Supplementary Information

# Templated nanoreactors array toward nanoscale-tunable liquid-phase catalysis

Shuo Zhang, Xie Quan,\* Shuo Chen and Hongtao Yu

Key Laboratory of Industrial Ecology and Environmental Engineering (MOE), School of Environmental Science and Technology, Dalian University of Technology, Linggong Road 2, Dalian 116024, China. E-mail: quanxie@dlut.edu.cn

### Experimental Section

**Materials and reagents.** Double-pass anodized aluminum oxide (AAO) in thickness of 70  $\mu\text{m}$  was supplied by Hefei Pu-Yuan Nano Technology Co. Ltd. (China). N-methyl-pyrrolidone ( $\geq 99\%$ , AR), zinc acetate dihydrate ( $\geq 99\%$ , AR), methanol ( $\geq 99.5\%$ , AR), ethanol ( $\geq 99.7\%$ , AR) were purchased from Damao Chemical Reagent Co. Ltd. (Tianjin, China). Cetyltrimethylammonium bromide ( $\geq 99\%$ , AR) and benzaldehyde ( $\geq 98.5$ , AR) were supplied by Sinopharm Chemical Reagent Co. Ltd. (Shanghai, China). Malononitrile (99%) was purchased from Aladdin Industrial Corporation (Shanghai, China). Benzylidenemalononitrile ( $> 98\%$ ) was purchased from TCI Development Co. Ltd. (Shanghai, China). There was no further purification of all the chemicals used in this work.

**Templated synthesis of nanoreactors.** Arrayed nanostructures were synthesized via AAO-templated solvothermal processes using sol-gel precursors. In a typical procedure, cetyltrimethylammonium bromide (CTAB) of 0.016 M were added in 20 mL of N-methyl-pyrrolidone (NMP) as a mixture solvent. Organic precursors, i.e., zinc acetate for zinc oxide nanotubes (Fig. 1a), ferrous chloride for iron oxide nanoplates (Fig. 1b), manganese acetate for manganese oxide (Fig. 1c), and cerium nitrate for cerium oxide nanobrushes (Fig. 1d), were added to the mixture matrix and ultrasonically treated for 25 min at 65 °C. Upon the formation of uniform sol, the prepared mixtures were placed in a Teflon-lined autoclave, together with AAO template

(200-300 nm pore) immersed at the middle of the vessel. The sealed autoclave was heated to 180 °C for 4 h and cooled down naturally at ambient temperature. Ultrasound was used to wash the surface of AAO-templated material in absolute ethanol environment. Afterwards, it was placed in a 40 °C oven for 1 h and then underwent a 2 h heating at 400 °C. Finally, the arrayed nanostructures were obtained.

**Characterization.** Material morphologies were examined by scanning electron microscopy (SEM) (S4800, Hitachi, Japan) and high-resolution transmission electron microscopy (HRTEM) (JEM-2000EX, Japan). Energy dispersive spectrometer (EDS) was obtained using field emission scanning electron microscope (NOVA NanoSEM 450, FEI, USA). DX-3000 X-ray diffractometer (Shimadzu, Japan) was employed to report X-ray diffraction (XRD) results, for which Cu K $\alpha$  monochromatic radiation was operated at 40 kV and 100 mA. Chemical composition of zinc oxide was examined by X-ray photoelectron spectroscopy (XPS) using Thermo Fisher XPS instrument (Escalab 250Xi, USA). CheBET Pulsar TPD Analyzer (Quantachrome, USA) was used to acquire temperature-programmed desorption profiles of ammonia (NH<sub>3</sub>-TPD) and carbon dioxide (CO<sub>2</sub>-TPD), respectively. Autosorb-iQ-C (Quantachrome, USA) was used for a measurement of nitrogen adsorption-desorption isotherms (-196.15 °C). The leaching of Zn<sup>2+</sup> ions was detected by inductively coupled plasma mass spectrometry (Nex ION 300D, PerkinElmer, USA).

**Catalytic reactions in ZnO<sub>NTs</sub>.** Reactions were performed in a two-pass reaction module (Fig. S4). The AAO-templated material was fixed on top of a perforated support and a rubber pad was inserted for a seal. For Knoevenagel condensation, ethanol matrix containing benzaldehyde and malononitrile in equimolar concentrations (13.5 mM) was prepared and stored in the feed tank. In a typical experiment, the mixture solution was first heated to designated temperature by a thermostat, then pumped into the module to initiate catalytic reaction, and permeate liquid was periodically collected and analyzed. The whole reaction system was placed in an oven to maintain the reaction temperature. The product benzylidenemalononitrile (BM) was detected by HPLC (Waters 2695 Separations Module) at wavelength of 221 nm with an eluent solution mixed by ultrapure water (30%) and methanol (70%) at a flowrate of 0.8 mL/min, using SunFire® C18 column (250 mm × 4.6 mm × 5  $\mu$ m) as the stationary phase.

**Determination of retention time ( $t_R$ ).** The time spent for passage of solution in arrayed nanotubes closely correlates with the pore size, arrangement, as well as the liquid flux. After a collection of diameters of the pores (labeled as  $d_i$ ) according to selected SEM region, the total porous area for passage of solution ( $s_p$ ,  $m^2$ ) can be determined according to Equation (S1),

$$s_p = \frac{A_0}{A_{SEM}} \cdot \sum_{i=1}^n d_i^2 \cdot \frac{\pi}{4} \quad (S1)$$

where  $A_0$  is the actual exposed area of  $ZnO_{NT}$  array for passage of solution,  $m^2$ ;  $A_{SEM}$  is the total area of selected SEM image for collection of  $d_i$ ,  $m^2$ ;  $n$  is the total number of pores recorded in the selected SEM image, dimensionless.

If the flux is controlled at  $Q$  ( $mL \text{ min}^{-1}$ ), the  $t_R$  (s) can be expressed as

$$t_R = \frac{s_p \cdot \delta \cdot 6 \cdot 10^{-5}}{Q}$$

(S2)

where  $\delta$  is the thickness of  $ZnO_{NT}/AAO$  composite, m.

Specifically, for tests on 168- $ZnO_{NT}$ , flow rates were controlled at  $1.0 \times 10^{-4}$ ,  $1.5 \times 10^{-4}$ ,  $3.0 \times 10^{-4}$ ,  $5.0 \times 10^{-4}$ , and  $1.5 \times 10^{-3} \text{ L min}^{-1}$  respectively, for which the corresponding  $t_R$  were respectively 0.61, 0.41, 0.20, 0.12, 0.04 s; for tests on pore size effect, the values of  $t_R$  were controlled at 0.122 s for 168- $ZnO_{NT}$  (flow rate:  $5.0 \times 10^{-4} \text{ L min}^{-1}$ ), 0.119 s for 96- $ZnO_{NT}$  (flow rate:  $3.0 \times 10^{-4} \text{ L min}^{-1}$ ), 0.099 s for 61- $ZnO_{NT}$  (flow rate:  $3.0 \times 10^{-4} \text{ L min}^{-1}$ ), 0.109 s for 26- $ZnO_{NT}$  (flow rate:  $1.5 \times 10^{-4} \text{ L min}^{-1}$ ) and 0.101 s for 10- $ZnO_{NT}$  (flow rate:  $1.0 \times 10^{-4} \text{ L min}^{-1}$ ), respectively.

**Regression analysis on  $R_{CT}$  value.** In our published work,<sup>1</sup> corresponding to different  $ZnO_{NTs}$  reactors with pore sizes of 168, 96, 61, 26 and 10 nm, the average values of dimensionless  $R_{CT}$  were  $3.15 \times 10^{-6}$ ,  $7.33 \times 10^{-6}$ ,  $12.14 \times 10^{-6}$ ,  $24.34 \times 10^{-6}$  and  $80.2 \times 10^{-6}$ , respectively. As shown in Equation (S3), non-linear regression analysis revealed that the  $R_{CT}$  value exponentially enhanced as a function of decreasing nanoreactor size ( $d_{ZnO_{NT}}$ ), with correlation coefficient in a relative high level ( $R^2 > 0.96$ ).

$$R_{CT} = [7.1 + 78.5 * \exp(-\frac{d_{ZnO_{NT}}^{-9.2}}{11.4})] * 10^{-6} \quad (10 \leq d_{ZnO_{NT}} \leq 168)$$

(S3)

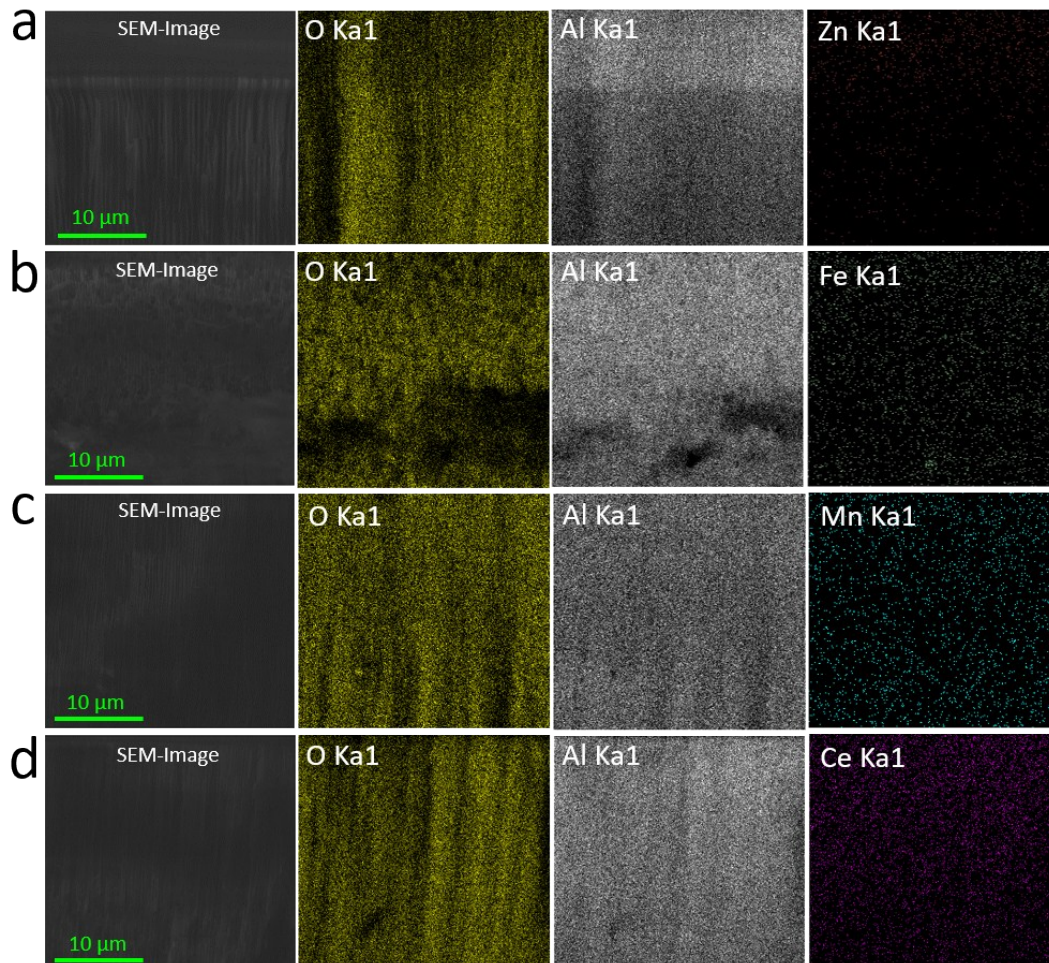

**Fig. S1** SEM-EDS mapping analysis of AAO-templated (a) zinc oxide nanotubes, (b) iron oxide nanoplates, (c) manganese oxide nanoparticles, and (d) cerium oxide nanobranches.

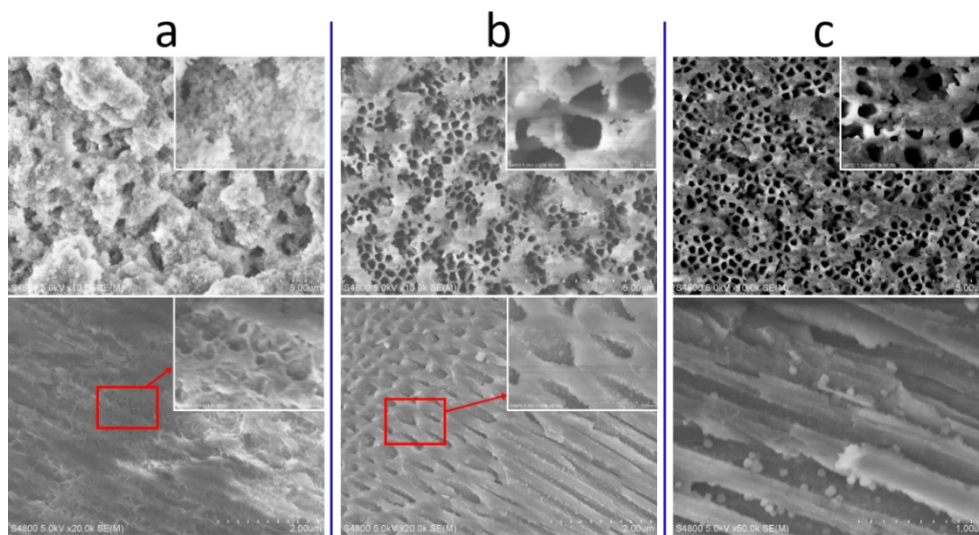

**Fig. S2** SEM images of the products following a typical procedure similar to the synthesis of ZnO<sub>NT</sub>. (a) Ultrapure water as the solvent in place of NMP. (b) Ethanol as the solvent in place of NMP. (c) NMP as the solvent without surfactant CTAB.

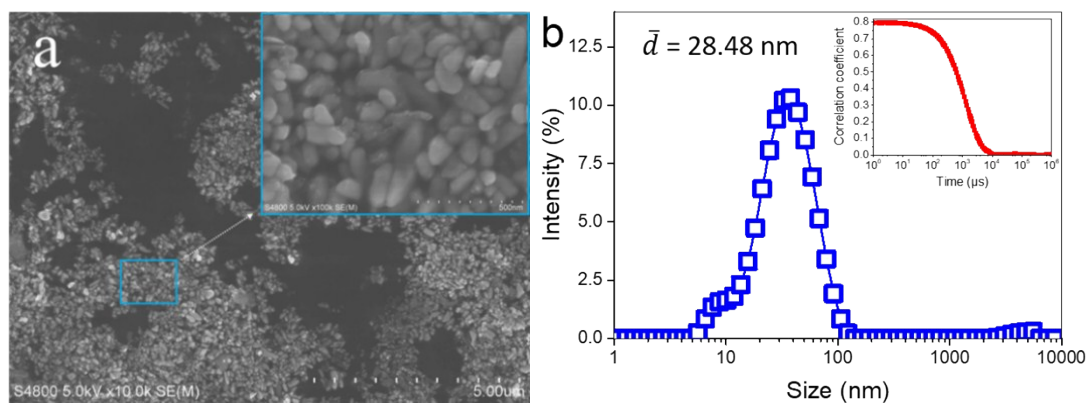

**Fig. S3** (a) SEM images and (b) size distribution of zinc oxide nanoparticles (ZnO<sub>NP</sub>).

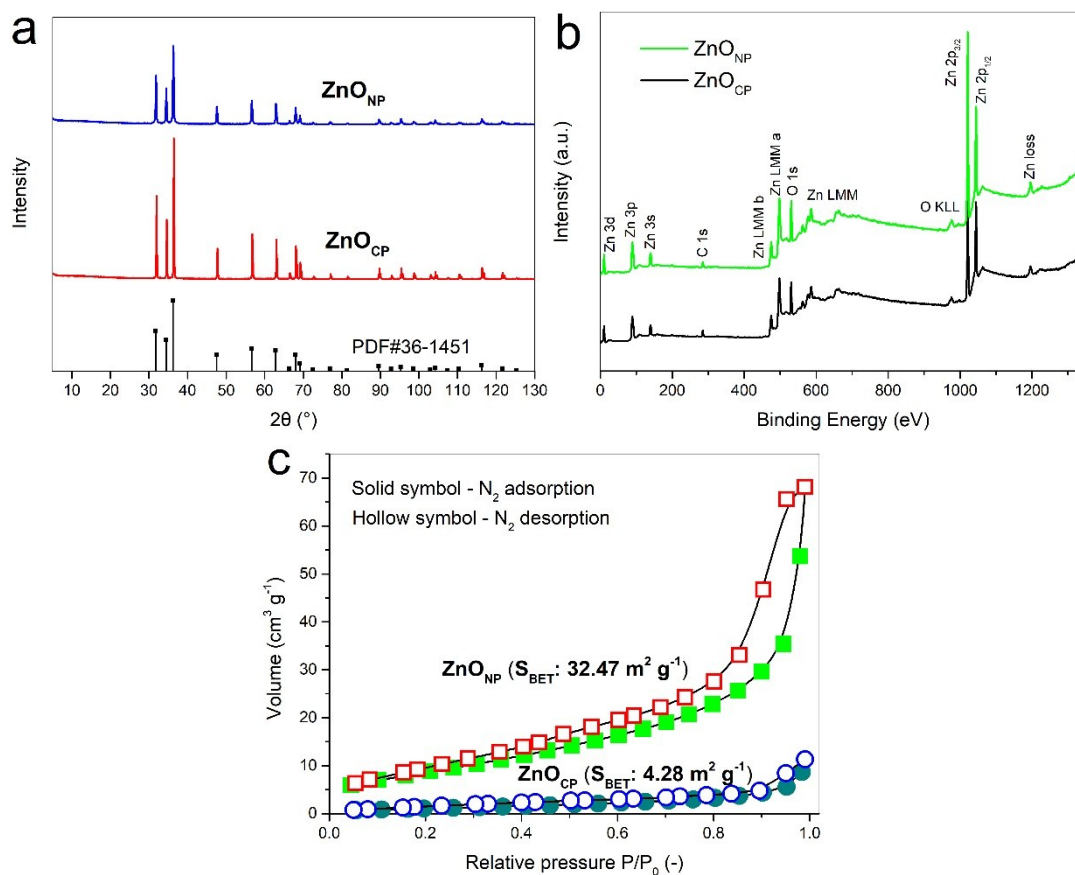

**Fig. S4** (a) XRD patterns, (b) XPS spectra, and (c) nitrogen adsorption/desorption isotherms for as-synthesized ZnO<sub>NP</sub> and commercial ZnO<sub>CP</sub>, respectively.

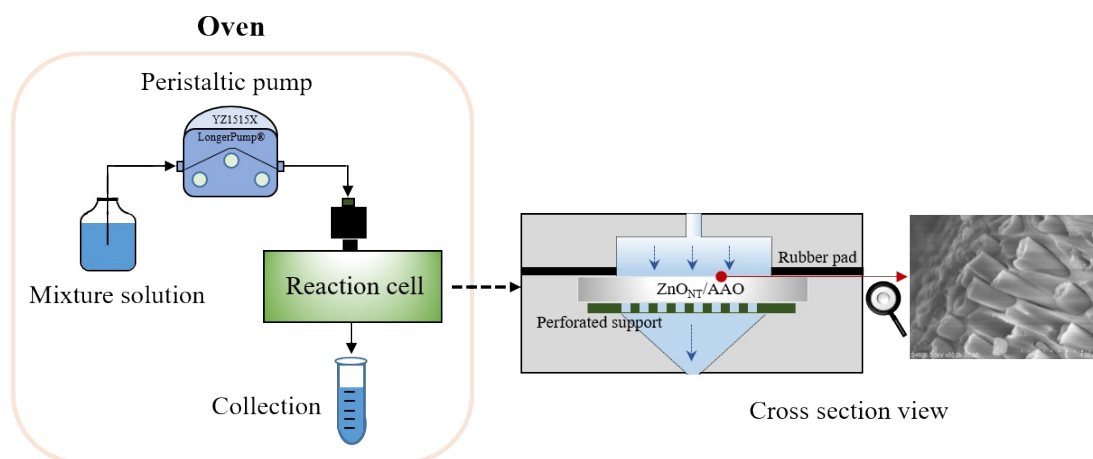

**Fig. S5** Schematic illustration of the flow-through system used for catalytic condensation.

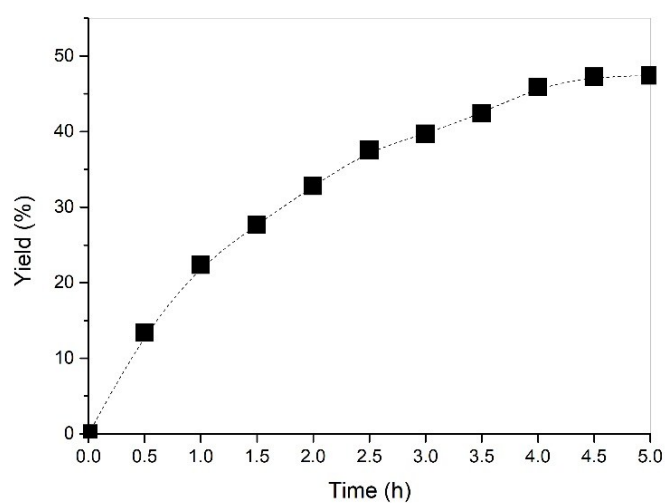

**Fig. S6** Yield of BM versus time for Knoevenagel condensation in the presence of ZnO<sub>NP</sub>.

Condition: temperature, 60 °C; solid load, 4 g L<sup>-1</sup>.

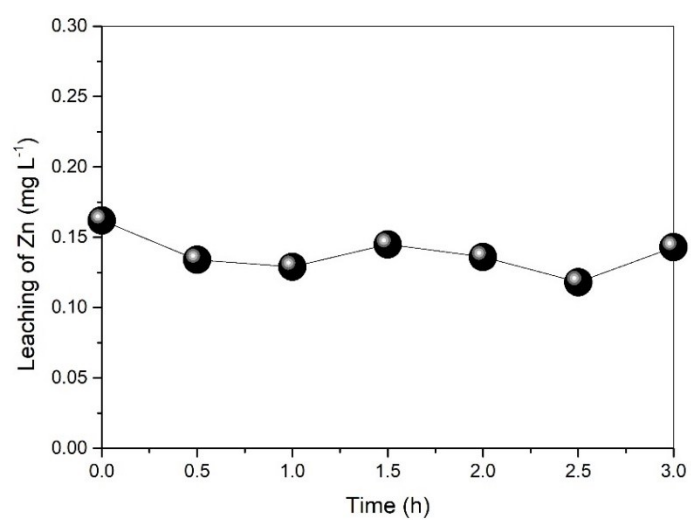

**Fig. S7** Leaching of Zn during ZnO<sub>NT</sub>-induced catalytic condensation.

Condition: temperature, 60 °C; liquid flux, 0.5 mL min<sup>-1</sup>.

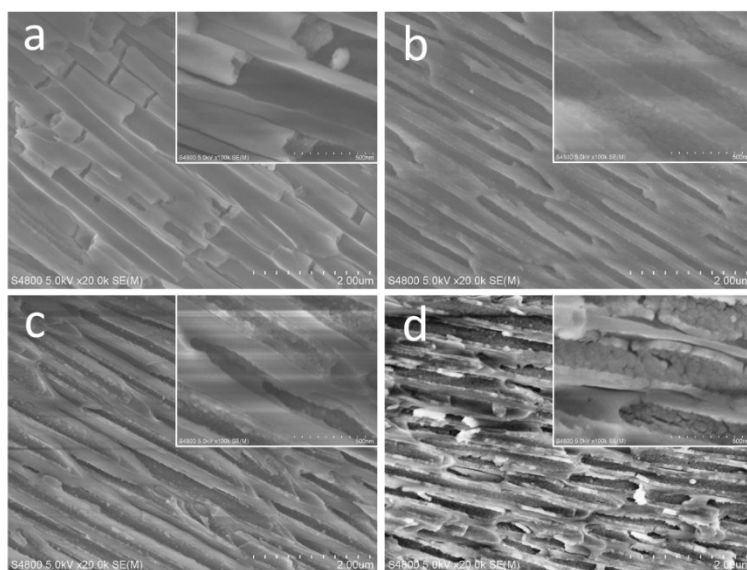

**Fig. S8** Cross-section view of ZnO<sub>NT</sub>/AAO after (a) 0 h, (b) 1 h, (c) 3 h and (d) 5 h reactions, respectively. Conditions: ZnO<sub>NT</sub>, 168 nm pore; liquid flux,  $0.5 \times 10^{-3} \text{ L min}^{-1}$ ; temperature, 60 °C.

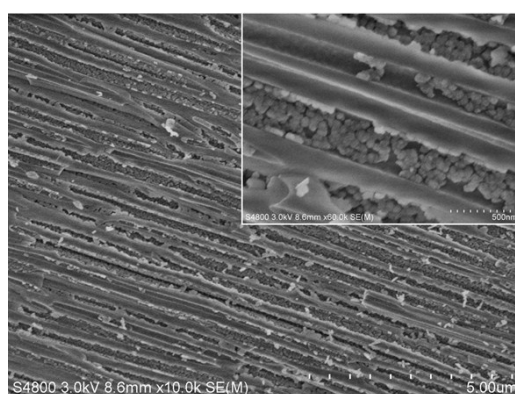

**Fig. S9** Cross-section view of ZnO<sub>NT</sub>/AAO after 5 h flow-through reaction. Conditions: ZnO<sub>NT</sub>, 168 nm pore; liquid flux,  $2.5 \times 10^{-3} \text{ L min}^{-1}$ ; temperature, 60 °C.

**Table S1** Comparison of ZnO<sub>NT</sub> nanoreactors with reported batch reactors<sup>2</sup> in conversion of benzylidenemalononitrile through Knoevenagel condensation of benzaldehyde with malononitrile.

| Catalyst                                                       | Description                                    | Mode          | Temp. (°C) | solvent                       | Yield (%) | Time (min)                                | Rate <sup>a</sup> (% s <sup>-1</sup> ) | Ref.      |
|----------------------------------------------------------------|------------------------------------------------|---------------|------------|-------------------------------|-----------|-------------------------------------------|----------------------------------------|-----------|
| ZnO <sub>NT</sub>                                              | arrayed nanotubes                              | Nano-reactor  | 60         | ethanol                       | 5.5-10.4  | 1.7×10 <sup>-3</sup><br>-10 <sup>-2</sup> | 17.0-54.5                              | This work |
| ZnO <sub>NP</sub>                                              | nanoparticles                                  | Batch reactor | 60         | ethanol                       | 47        | 300                                       | 2.61×10 <sup>-3</sup>                  | This work |
| ZnO                                                            | powdered precipitates                          | Id.           | room       | -                             | 92        | 80                                        | 1.9×10 <sup>-2</sup>                   | a         |
| NF-ZnO                                                         | nanoflakes                                     | Id.           | 25         | -                             | 90        | 210                                       | 7.1×10 <sup>-3</sup>                   | b         |
| NaYN-850                                                       | ammonia-nitridated NaY zeolite                 | Id.           | 80         | toluene                       | 90        | 180                                       | 8.3×10 <sup>-3</sup>                   | c         |
| BZN30024                                                       | nitridation of zeolite beta at 300°C           | Id.           | 80         | toluene                       | 93        | 15                                        | 0.1                                    | d         |
| LZSM-5-AT-OH <sup>-</sup>                                      | ammonia-modified ZSM-5 zeolite                 | Id.           | 80         | toluene                       | 92.6      | 60                                        | 2.6×10 <sup>-2</sup>                   | e         |
| ZIF-8                                                          | Zn-incorporated zeolitic imidazolate framework | Id.           | 20         | toluene                       | 60        | 240                                       | 4.2×10 <sup>-3</sup>                   | f         |
| Fe-MIL-101-NH <sub>2</sub>                                     | iron-containing MOF                            | Id.           | 80         | toluene                       | 78        | 30                                        | 4.3×10 <sup>-2</sup>                   | g         |
| {[Lu(BTC)(H <sub>2</sub> O)]·DMF} <sub>n</sub>                 | needle-shaped Lu(III)-MOF                      | Id.           | 100        | p-xylene                      | 57        | 480                                       | 2.0×10 <sup>-3</sup>                   | h         |
| ABIL@HKUST-1/Ethanol                                           | amino-functionalized hybrid MOF                | Id.           | 30         | toluene                       | 100       | 210                                       | 7.9×10 <sup>-3</sup>                   | i         |
| CAU-1-NH <sub>2</sub>                                          | Al-based MOF with amino groups                 | Id.           | 40         | ethanol                       | 94        | 60                                        | 2.6×10 <sup>-2</sup>                   | j         |
| UiO-66-NH <sub>2</sub>                                         | amino-functionalized Zr(IV)-MOF                | Id.           | 40         | DMF                           | 98        | 40                                        | 4.1×10 <sup>-2</sup>                   | k         |
| NH <sub>2</sub> (50%)-MIL-53(Al)                               | amino-based MOF                                | Id.           | 80         | DMF                           | 99        | 300                                       | 5.5×10 <sup>-3</sup>                   | l         |
| N-GO-1.00                                                      | amine grafted graphene oxide                   | Id.           | 40         | decane/<br>CH <sub>3</sub> CN | 96.5      | 240                                       | 6.7×10 <sup>-3</sup>                   | m         |
| Chitosan                                                       | purchased solid base catalyst                  | Id.           | 40         | ethanol                       | 98        | 60                                        | 2.7×10 <sup>-2</sup>                   | n         |
| MPB                                                            | magnetic polymer brushes                       | Id.           | NA         | tetrahydrofuran               | 99.4      | 480                                       | 3.5×10 <sup>-3</sup>                   | o         |
| RhPt/TC@GO                                                     | monodisperse rhodium/platinum nanoparticles    | Id.           | room       | water/<br>methanol            | >99       | 10                                        | >0.17                                  | p         |
| Pd/AlO(OH)                                                     | commercial composite nanoparticles             | Id.           | room       | water/<br>methanol            | 85        | 25                                        | 5.7×10 <sup>-2</sup>                   | q         |
| Fe <sub>3</sub> O <sub>4</sub> @SiO <sub>2</sub> @Ni-Zn-Fe LDH | magnetic layered double hydroxide              | Id.           | 60-70      | ethanol                       | 85        | 40                                        | 3.5×10 <sup>-2</sup>                   | r         |

<sup>a</sup> A quick back calculation of the average value according to the reported yield of product and time spent for catalysis.



## References

- 1 S. Zhang, X. Quan, D. Wang, *Environ. Sci. Technol.* 2018, **52**, 8701-8711.
- 2 (a) M. Basude, P. Sunkara, V. S. Puppala, *J. Chem. Pharm. Res.* 2013, **5**, 46-50; (b) M. Hosseini-Sarvari, H. Sharghi, S. Etemad, *Helv. Chim. Acta* 2008, **91**, 715-724; (c) S. Ernst, M. Hartmann, S. Sauerbeck, T. Bongers, *Appl. Catal. A-Gen.* 2000, **200**, 117-123; (d) K. Narasimharao, M. Hartmann, H. H. Thiel, S. Ernst, *Micropor. Mesopor. Mat.* 2006, **90**, 377-383; (e) L. Xu, C. Li, K. Zhang, P. Wu, *ACS Catal.* 2014, **4**, 2959-2968; (f) H. Y. Cho, J. Kim, S. N. Kim, W. S. Ahn, *Micropor. Mesopor. Mat.* 2013, **169**, 180-184; (g) M. Hartmann, M. Fischer, *Micropor. Mesopor. Mat.* 2012, **164**, 38-43; (h) M. Alması, V. Zeleňák, M. Opanasenko, I. Cisařová, *Catal. Today* 2015, **243**, 184-194; (i) Q. Luo, B. An, M. Ji, S. E. Park, C. Hao, Y. Li, *J. Porous Mater.* 2015, **22**, 247-259; (j) A. Dhakshinamoorthy, N. Heidenreich, D. Lenzen, N. Stock, *CrystEngComm* 2017, **19**, 4187-4193; (k) Y. Yang, H. F. Yao, F. G. Xi, E. Q. Gao, *J. Mol. Catal. A-Chem.* 2014, **390**, 198-205; (l) F. Martínez, G. Orcajo, D. Briones, P. Leo, G. Calleja, *Micropor. Mesopor. Mat.* 2017, **246**, 43-50; (m) B. Xue, J. Zhu, N. Liu, Y. Li, *Catal. Commun.* 2015, **64**, 105-109; (n) B. Sakthivel, A. Dhakshinamoorthy, *J. Colloid. Interf. Sci.* 2017, **485**, 75-80; (o) C. S. Gill, W. Long, C. W. Jones, *Catal. Lett.* 2009, **131**, 425-431; (p) B. Şen, E. H. Akdere, A. Şavk, E. Gültekin, Ö. Paralı, H. Göksu, F. Şen, *Appl. Catal. B-Environ.* 2018, **225**, 148-153; (q) H. Göksu, E. Gültekin, *ChemistrySelect* 2017, **2**, 458-463; (r) M. Gilanizadeh, B. Zeynizadeh, *New J. Chem.* 2018, **42**, 8553-8566.
